# Supplementary material
Source: PubMed Central journal article supplement (PMC3094120)
Supplement: emboj201142s1.pdf [file emboj201142s1.pdf]

**SUPPLEMENTAL INFORMATION ABED ET AL.**

- Supplemental Tables S1, S2
- Description of *hairy* alleles used in this study.
- Protein extraction methods.
- Supplemental Figures S1, S2, S3, S4, S5, S6.

**Table S1: Dgrn suppresses Gro related phenotypes**

**A. Expression of a functional Dgrn alleviates Gro small eye phenotype (P<0.01)**

| Genotype                                         | % Severe Small Eye phenotype         | n  |
|--------------------------------------------------|--------------------------------------|----|
| Ey-Gal4/+;UAS-GFP/+                              | 0                                    | 55 |
| Ey-Gal4/+;UAS-Gro/+                              | 100                                  | 50 |
| Ey-Gal4/+;UAS-Dgrn/+;UAS-Gro/+                   | 4                                    | 47 |
| Ey-Gal4/+;UAS-Dgrn <sup>HC/AA</sup> /+;UAS-Gro/+ | 90 (10 with a less severe phenotype) | 61 |
| Ey-Gal4/+; UAS-Dgrn <sup>I268A</sup> ; UAS-Gro/+ | 55 (45 with a less severe phenotype) | 60 |
| Ey-Gal4/+;UAS- Dgrn <sup>ΔSIMS</sup> ;UAS-Gro/+  | 98                                   | 70 |
| Ey-Gal4/+UAS-Dgrn                                | 0                                    | 60 |
| Ey-Gal4/+UAS-Dgrn <sup>HC/AA</sup> /+            | 0                                    | 56 |
| Ey-Gal4/+ UAS-Dgrn <sup>I268A</sup> /+           | 0                                    | 70 |
| Ey-Gal4/+UAS-Dgrn <sup>ΔSIMS</sup> /+            | Die at pupal stage- headless         | 0  |

Eyeless-Gal4, Ey-GAL4;

**B. Expression of Dgrn alleviates Gro dependent repression during the formation of notal bristles (P<0.01).**

| Genotype                                         | % of adults with fewer than 3 scutellar bristles | n   |
|--------------------------------------------------|--------------------------------------------------|-----|
| C253-Gal4/+; UAS-GFP/+                           | 0                                                | 211 |
| C253-Gal4/+; UAS-Gro/+                           | 53                                               | 294 |
| C253-Gal4/UAS-Dgrn; UAS-Gro/+                    | 30                                               | 208 |
| C253-GAL4/UAS- Dgrn <sup>HC/AA</sup> ; UAS-Gro/+ | 59                                               | 216 |
| C253-GAL4/UAS- Dgrn <sup>ΔSIMS</sup> ;UAS-Gro/+  | 41                                               | 115 |
| C253-Gal4/UAS-Dgrn                               | 0                                                | 218 |
| C253-GAL4/UAS-Dgrn <sup>HC/AA</sup>              | 0                                                | 215 |
| C253-GAL4/UAS-Dgrn <sup>ΔSIMS</sup>              | 0                                                | 112 |

| Genotype                       | % of adults with ectopic bristle | n   |
|--------------------------------|----------------------------------|-----|
| UAS-GFP/+ ;Pnr-Gal4/+          | 0                                | 130 |
| Pnr-Gal4/ UAS-Gro-i            | 100                              | 108 |
| Pnr-Gal4/ UAS-Gro-i,UAS Dgrn-i | 0                                | 112 |
| Pnr-GAL4/UAS- Dgrn-i           | 0                                | 109 |

Gro-i, RNAi Gro transgene; Dgrn-i, RNAi Gro transgene

**Table S2:** 59 Dgrn and Gro shared targets identified using DamID in *Drosophila* Kc cells.

| Gene          | Designation | Cytological location | Biological process                 |
|---------------|-------------|----------------------|------------------------------------|
| sm            | CG9218      | 56D15-56E1           | Axon Guidance                      |
| Mical         | CG33208     | 85F5-85F7            | Axon Guidance                      |
| Con           | CG7503      | 64C2-64C4            | Cell adhesion                      |
| Scrib         | CG5462      | 97B9-97C1            | Cell polarity                      |
| Cbp53E        | CG6702      | 53E4-53E4            | Cellular homeostasis               |
| Fpps          | CG12389     | 47F1-47F1            | Cholesterol metabolism             |
| cid           | CG13329     | 50A11-50A11          | Chromatin structure                |
| HP4           | CG8044      | 66A21-66A21          | Chromatin structure                |
| Msp-300       | CG33715     | 25C7-25C10           | Cytoplasmic transport              |
| Htt           | CG9995      | 98E2-98E2            | Cytoskeleton                       |
| Tun           | CG8253      | 52C8-52C8            | Learning                           |
| —             | CG5976      | 77C4-77C4            | Metabolism-Proteolysis             |
| —             | CG32700     | 8E4-8E7              | Metabolism                         |
| —             | CG7077      | 94A5-94A5            | Metabolism                         |
| —             | CG10184     | 95A4-95A4            | Metabolism                         |
| —             | CG7544      | 51E2-51E2            | Methylation                        |
| mei-S328      | CG5303      | 58B9-58B10           | Mitosis                            |
| Smc5          | CG32438     | 78D6-78D7            | Mitosis                            |
| Kirre         | CG3653      | 3C3-3C7              | Myogenesis                         |
| MRE10         | GM08676     |                      | ncRNA                              |
| MRE20         | LD03248     | 3A3-3A4              | ncRNA                              |
| MRE30         | CR32028     | 66C13-66C13          | ncRNA                              |
| dpr11         | CG33202     | 83F1-83F4            | Neuronal behavior                  |
| dpr9          | CG33485     | 88E1-88E1            | Neuronal behavior                  |
| cta           | CG17678     | 2L                   | Signaling                          |
| igl           | CG18285     | 51E3-51E5            | Signaling Ca <sup>+2</sup> binding |
| Amon          | CG6438      | 97C4-97C5            | Signaling-Hormone processing       |
| nAcR&beta-64B | CG11348     | 64B6-64B6            | Signaling-Ion transport            |
| —             | CG8422      | 50F8-50F9            | Signaling-Neuronal                 |
| CSN7          | CG2038      | 44C6-44C6            | Signaling-Signalosome              |
| —             | CG30078     | 51F1-51F1            | Signaling-Thermotaxis              |
| Bi            | CG3578      | 4C3-4C4              | Transcription                      |
| Ci            | CG2125      | 102A1-102A3          | Transcription                      |
| Tio           | CG12630     | 40D3-40D3            | Transcription                      |
| Sox100B       | CG15552     | 100B2-100B2          | Transcription                      |
| —             | CG9705      | 73C4-73C4            | Transcription                      |
| zfh2          | CG1449      | 102C3-102C4          | Transcription                      |
| Bari1         |             |                      | Transposable element               |
| —             | CG32633     | 12A4-12A4            | Unknown                            |
| —             | CG9106      | 13B4-13B4            | Unknown                            |
| —             | CG14033     | 25D2-25D2            | Unknown                            |
| —             | CG7251      | 25F1-25F1            | Unknown                            |
| —             | CG18480     | 35D3-35D3            | Unknown                            |
| —             | CG15233     | 42C1-42C1            | Unknown                            |
| Coilin        | CG8710      | 44B3-44B3            | Unknown                            |
| —             | CG30069     | 50E2-50E3            | Unknown                            |
| —             | CG12424     | 51D6-51D6            | Unknown                            |
| —             | CG42365     | 57F7-57F7            | Unknown                            |
| —             | CG7049      | 61B2-61B2            | Unknown                            |
| —             | CG32333     | 61F4-61F5            | Unknown                            |
| —             | CG14965     | 63B10-63B11          | Unknown                            |
| —             | CG12213     | 87A3-87A3            | Unknown                            |
| —             | CG5060      | 92D9-92E1            | Unknown                            |
| —             | CG7084      | 94A4-94A4            | Unknown                            |
| beat-IV       | CG10152     | 95A2-95A2            | Unknown                            |
| —             | CG5515      | 95E8-95E8            | Unknown                            |
| —             | CG34354     | 98C2-98C2            | Unknown                            |
| —             | CG32850     | 102B3-102B4          | Unknown                            |
| —             | GM03205     |                      | Unknown                            |

\* CG8669, cryptocephal (crc), location 39C2-3 is the only shared target between CtBP and Dgrn.

## Hypomorphic *hairy* alleles used in the study:

*hairy*<sup>7H</sup> and *hairy*<sup>12C</sup> are well-characterized *hairy* hypomorphic alleles that have been used to study Hairy function during segmentation and PNS specification, as well as in interactions with Groucho, CtBP, Sir2 and other hairy cofactors (see for example: Poortinga *et al.*, 1998; Phippen *et al.*, 2000). *hairy*<sup>7H</sup> is an EMS-generated point mutation that leads to a premature stop codon being introduced just after the basic region (L72\*; referred to in FlyBase as *h*<sup>26</sup>). *hairy*<sup>12C</sup> is an EMS-generated point mutation that mutates the Proline residue of Hairy's C-terminal WRPW motif (P336L; referred to in FlyBase as *h*<sup>30</sup>). *hairy*<sup>1</sup> is a viable *hairy* allele that exhibits ectopic bristles.

## Protocols for SUMOylation assay in cells :

*In vivo* SUMOylation assays was similar to Tatham *et al.* (Nature protocols 4(9):1363:1371). SUMOylation assays were performed by either one of the following methods as stated in the manuscript:

**1) Guanidine HCl method:** S2R cells were transfected with combinations of Gal4-driven expression vectors for Gro, Dgrn, Dgrn<sup>HC/AA</sup> and Dgrn<sup>ΔSIMs</sup>, and a His-Sumo2 expression plasmid. 48 h after transfection, cells were harvested, lysed in buffer A (6 M guanidinium-HCl, 0.1 M sodium phosphate buffer pH 8.0, 250 mM sodium chloride, 10 mM imidazole, 0.4% Triton X-100 and 0.1 mM *N*-ethyl maleimide), sonicated, and cellular debris was removed by centrifugation. The lysate was incubated with Ni-NTA beads (Qiagen) overnight at 4°C with gently spinning to purify His-tagged proteins. The beads were washed twice with buffer A, twice with a 1:4 mixture of buffer A and buffer B respectively (25 mM Tris-HCl, pH 6.8, and 20 mM imidazole), and twice with buffer B. Bound proteins were eluted by boiling in SDS sample buffer containing 200 mM imidazole, and eluted proteins were analyzed by Western blotting.

**2) Hot Lysis Buffer method:** S2R cells were transfected as mentioned above. 48 h after transfection, cells were harvested and lysed in boiling hot lysis buffer (2% SDS, 20mM EDTA, 50mM Tris-HCl pH 8.0, 20mM DTT, 20mM *N*-ethyl maleimide), boiled, sonicated and cellular debris was removed by centrifugation. The lysate was diluted 1:10 with TNN buffer (50mM Tris-HCl pH 7.5, 120mM sodium chloride, 5mM EDTA, 0.5% NP-40) and incubated with EZview™ Red anti-HA Affinity Gel (Sigma Aldrich) overnight at 4°C with gently spinning. Sepharose beads were washed three times with TNN buffer and eluted by boiling in SDS sample buffer. Eluted proteins were analyzed by Western blotting.

**3) RIPA buffer:** 10mM Tris-HCl pH 7.4, 150mM sodium chloride, 1% NP-40, 1% sodium deoxycholate, 0.1% SDS.

## Abed et al.\_Figure S1

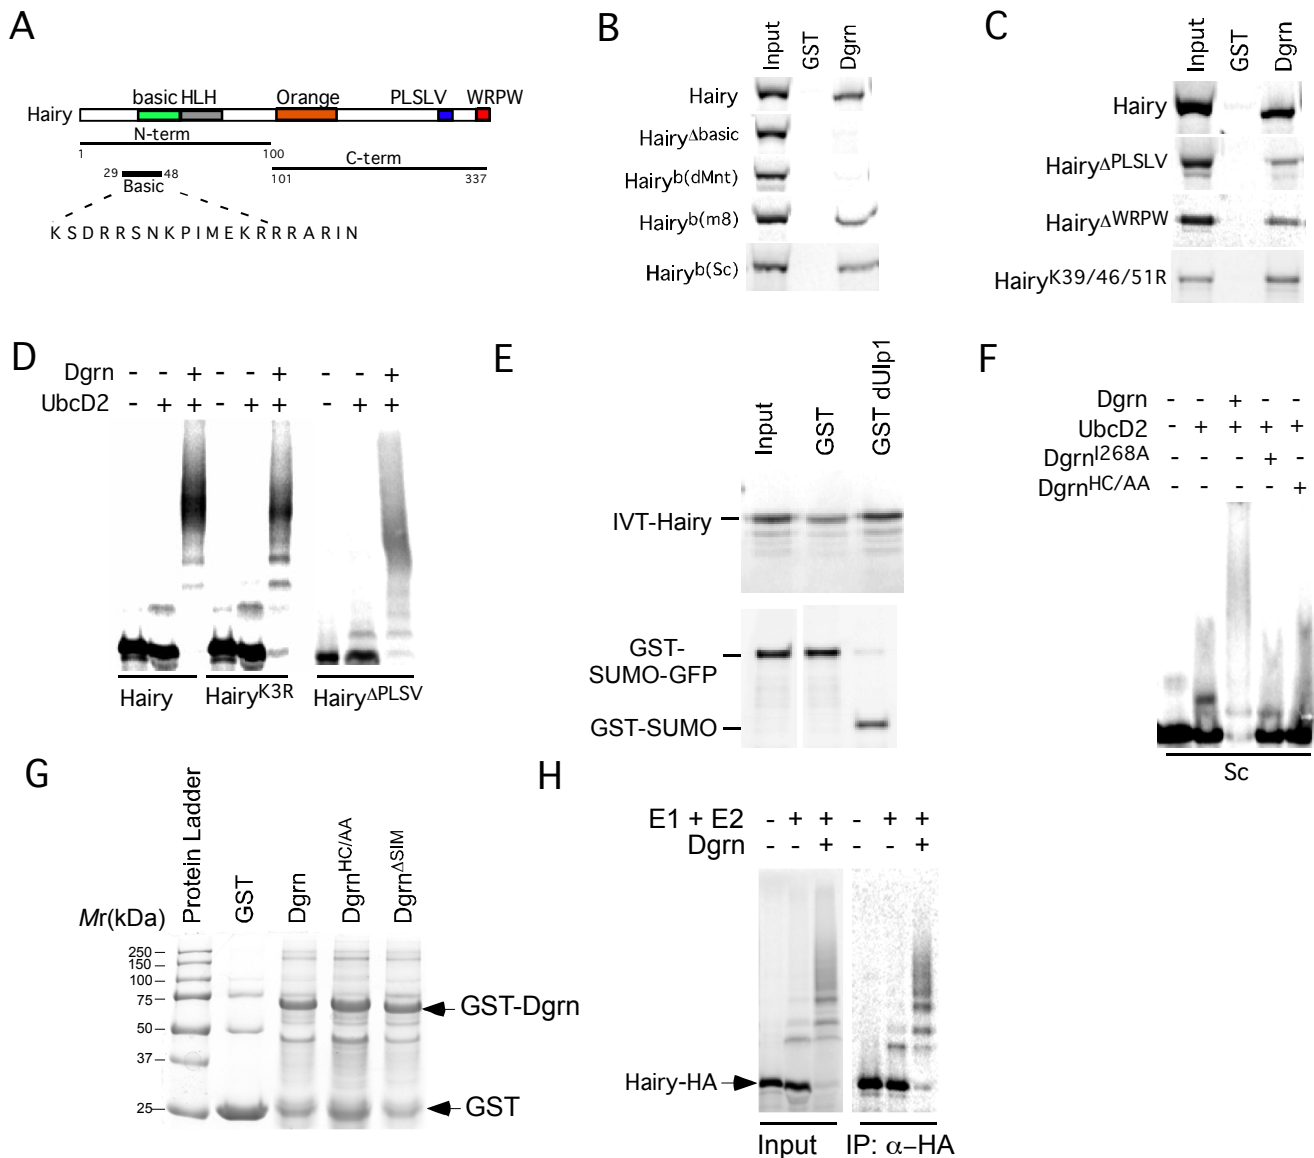

### Figure S1. Molecular recognition and ubiquitylation of Hairy and Scute proteins by Dgrn.

- (A)** Diagram depicting Hairy domains. N-terminal (1-100aa) and C-terminal (101-338aa) Hairy fragments were used initially to map the interaction region between Dgrn and Hairy. Dgrn binds to 20 amino-acids derived from Hairy's basic domain (see also Figure 1).
- (B)** Binding of Hairy to Dgrn in GST pull-down assays requires Hairy's basic domain. Substituting the basic domain with the basic domains derived from other Dgrn binding proteins [Esp1(m8) or Sc], but not from the non-binding bHLH repressor dMnt, restores binding.
- (C)** GST pull-down assays with the indicated Hairy mutants show that the CtBP recruitment motif (PLSLV), as well as the Gro recruitment motif (WRPW), are not required for Dgrn binding. Replacement of Lys residues with Arg within a putative SUMOylation site (K39,46,51R), does not alter binding or ubiquitylation (not shown).
- (D)** Dgrn efficiently ubiquitylates *in vitro* Hairy proteins that are either mutated in a putative SUMOylation site located between the dCtBP and Gro recruitment motifs (Lys 325, 326, 328; designated Hairy<sup>K3R</sup>), or that lacks the CtBP recruitment motif (Hairy $\Delta$ PLSLV).
- (E)** Treatment with the SUMO specific isopeptidase Ulp does not alter Hairy's mobility in SDS-PAGE (upper panel). In contrast, treatment of GST-GFP-SUMO with Ulp results in a faster migrating GST-SUMO species (lower panel), suggesting that IVT-Hairy is not SUMOylated. Ulp treatment was performed as described (1).
- (F)** A functional Dgrn but not RING mutants, ubiquitylates the bHLH activator Scute (Sc) *in vitro* in a partially purified reconstituted system.
- (G)** Coomassie-blue staining of the proteins bound to sepharose-glutathione beads used in Figure 1J (12.5% SDS-PAGE gel).
- (H)** To test if ubiquitylation of Hairy results in clipping of its WRPW domain we tested if Hairy that is tagged with HA at its C-termini retains its tag upon ubiquitylation and subsequent anti-HA IP. As shown ubiquitylated Hairy has an intact c-termini.
- (1) Bhaskar, V., Valentine, S.A., and Courey, A.J. (2000). A functional interaction between dorsal and components of the Smt3 conjugation machinery. *J. Biol. Chem.* 275, 4033-4040.

## Abed et al.\_ Figure S2

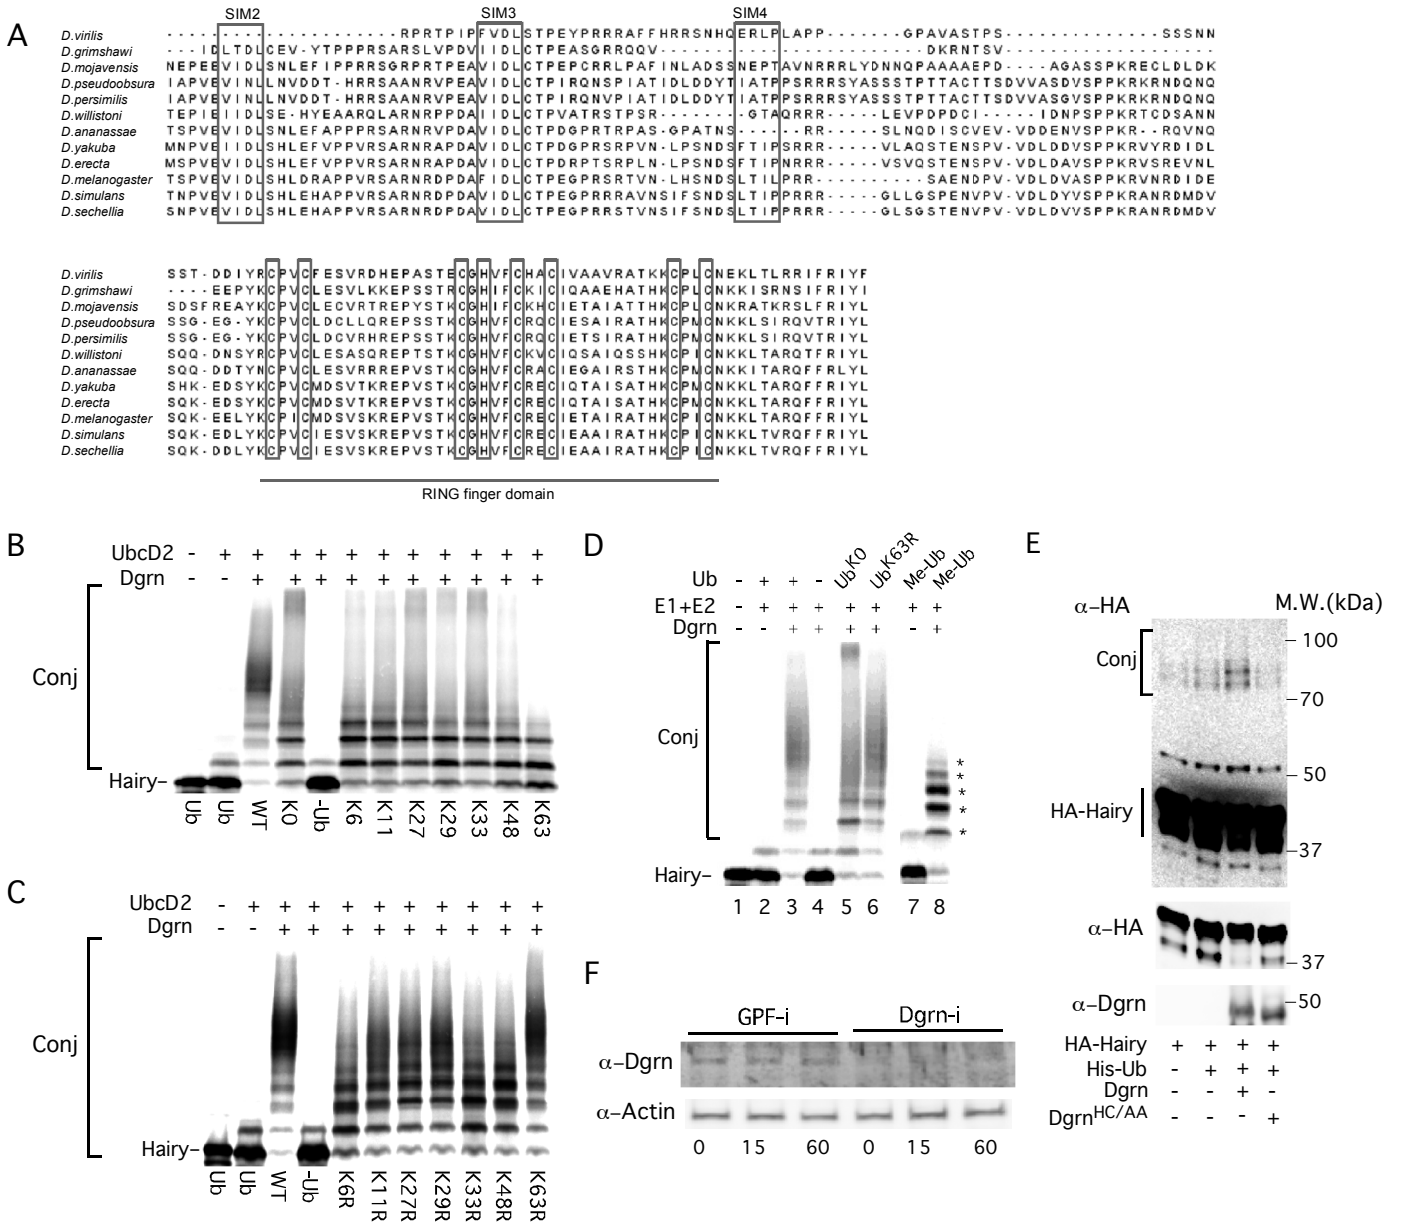

**Figure S2. Dgrn protein is well conserved between *Drosophila* species and Dgrn catalyzes the generation of a mixed poly-ubiquitin tree.**

(A) Protein sequence alignment of Dgrn orthologs from twelve *Drosophila* species. Three of the putative SIM domains are boxed and labeled (the first SIM is less conserved and is not shown).

The zinc coordinating residues within the RING finger domain are boxed.

(B) Ubiquitylation with ubiquitin derivatives, which contain only a single internal Lys residue (as indicated), is sufficient to support conjugation of Hairy. Note that Lys-48 and -63 are the least efficient.

(C) No single Lys residue is critically required for Hairy ubiquitylation. Ubiquitin derivatives where single Lys residues are replaced with Arg efficiently support Hairy's ubiquitylation.

(D) *In vitro* ubiquitylation assays with and without ubiquitin (lanes 3 and 4), or with ubiquitin derivatives UbK63R and UbK0 (lanes 5 and 6). Since high molecular weight Hairy-Ub conjugates are detected in all cases, the chains are likely of mixed types. Hairy ubiquitylation using the Me-Ub derivative (methylated-ubiquitin; lanes 7 and 8) reveals that at least 5-6 independent Lys residues are involved (indicated by "\*"), and that the Ub linkage is not solely made of linear N-terminal poly-ubiquitylation.

(E) Dgrn ubiquitylates Hairy in cells. 293T cells were transfected with the indicated pCDNA3-based vectors 48h after transfection proteins were extracted using guanidine-HCl buffer were prepared and visualized using western-blot analysis and the indicated antibodies. The middle pane is a short exposure, note the disappearance of the lower Hairy band. Conj. denotes Hairy-Ub conjugates.

(F) Western-blot analysis of S2R *Drosophila* cell extract. Dgrn protein levels are reduced in Dgrn RNAi (Dgrn-i) during a 60 minute cyclohexamide (CHX) chase experiment, whereas it remains unaffected when control RNAi (GFP-i) is applied.

## Abed et al.\_Figure S3

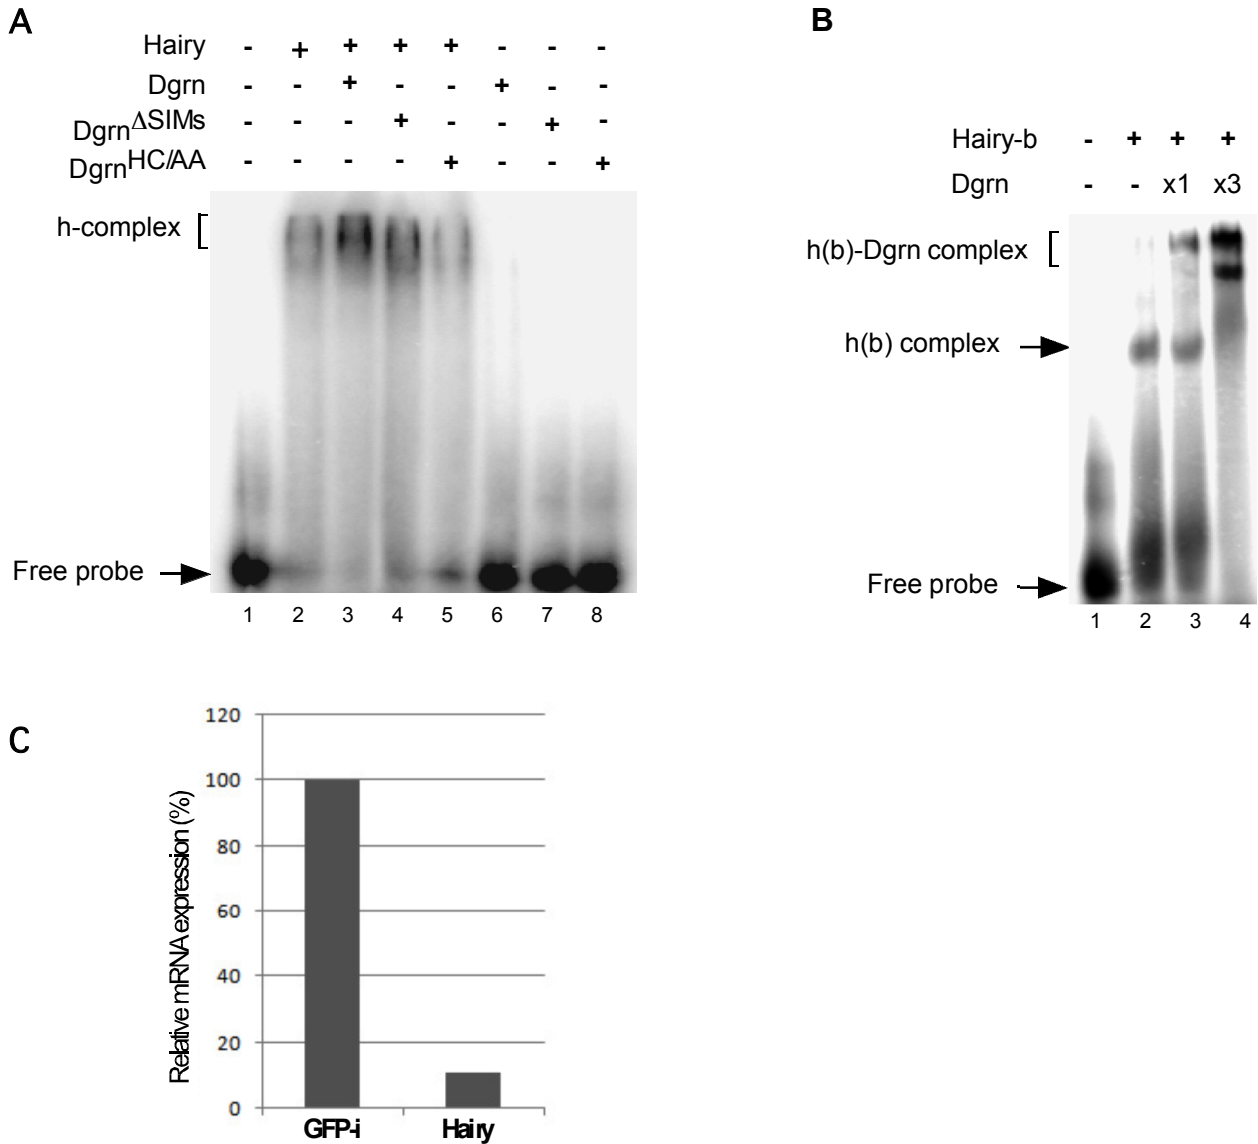

### (A-B) Purified Dgrn and Hairy form a complex on DNA *in vitro*.

**(A)** Dgrn does not displace Hairy from DNA. Electro-Mobility Shift Assay (EMSA) showing that the binding of full length bacterially expressed Hairy to the *ac* promoter-derived Hairy binding site is not abolished by Dgrn or its mutant derivatives as indicated (compare lane 2 to 3-5). Dgrn and its mutants show minimal or no binding to the Hairy binding site on their own (lanes 6-8). EMSA was performed as described in (1). The free probe is shown at the bottom. “h-complex” denotes the slow migrating Hairy-DNA complex.

**(B)** Dgrn binds to Hairy’s basic domain and results in a supershift of the Hairy(basic)-DNA complex. EMSA shows that bacterially expressed Hairy basic domain (1-48aa, Hairy-b) binds to the *ac* promoter-derived Hairy binding site (lane 2). In addition, increasing amounts of bacterially expressed Dgrn (x1 and x3 correspond to 100ng and 300ng of Dgrn protein respectively) which also binds Hairy’s basic region domain, forms a slower migrating complex (compare lanes 3 and 4 to lane 2). h(b) denotes Hairy-basic.

**(C) qPCR analysis of RNAi-mediated targeting of Hairy.** To quantify the extent of Hairy-RNAi targeting in S2R cells the levels of Hairy’s mRNA were compared between cells with specific Hairy targeting (Hairy-i) to that of cells targeted with control RNAi (GFP-i) using qPCR. Relative mRNA expression is shown.

(1) Bianchi-Frias *et al.* (2004). Hairy-mediated transcriptional repression and cofactor recruitment in *Drosophila* *PLoS Biology* 2:975-986.

**Abed et al.\_Figure S4**

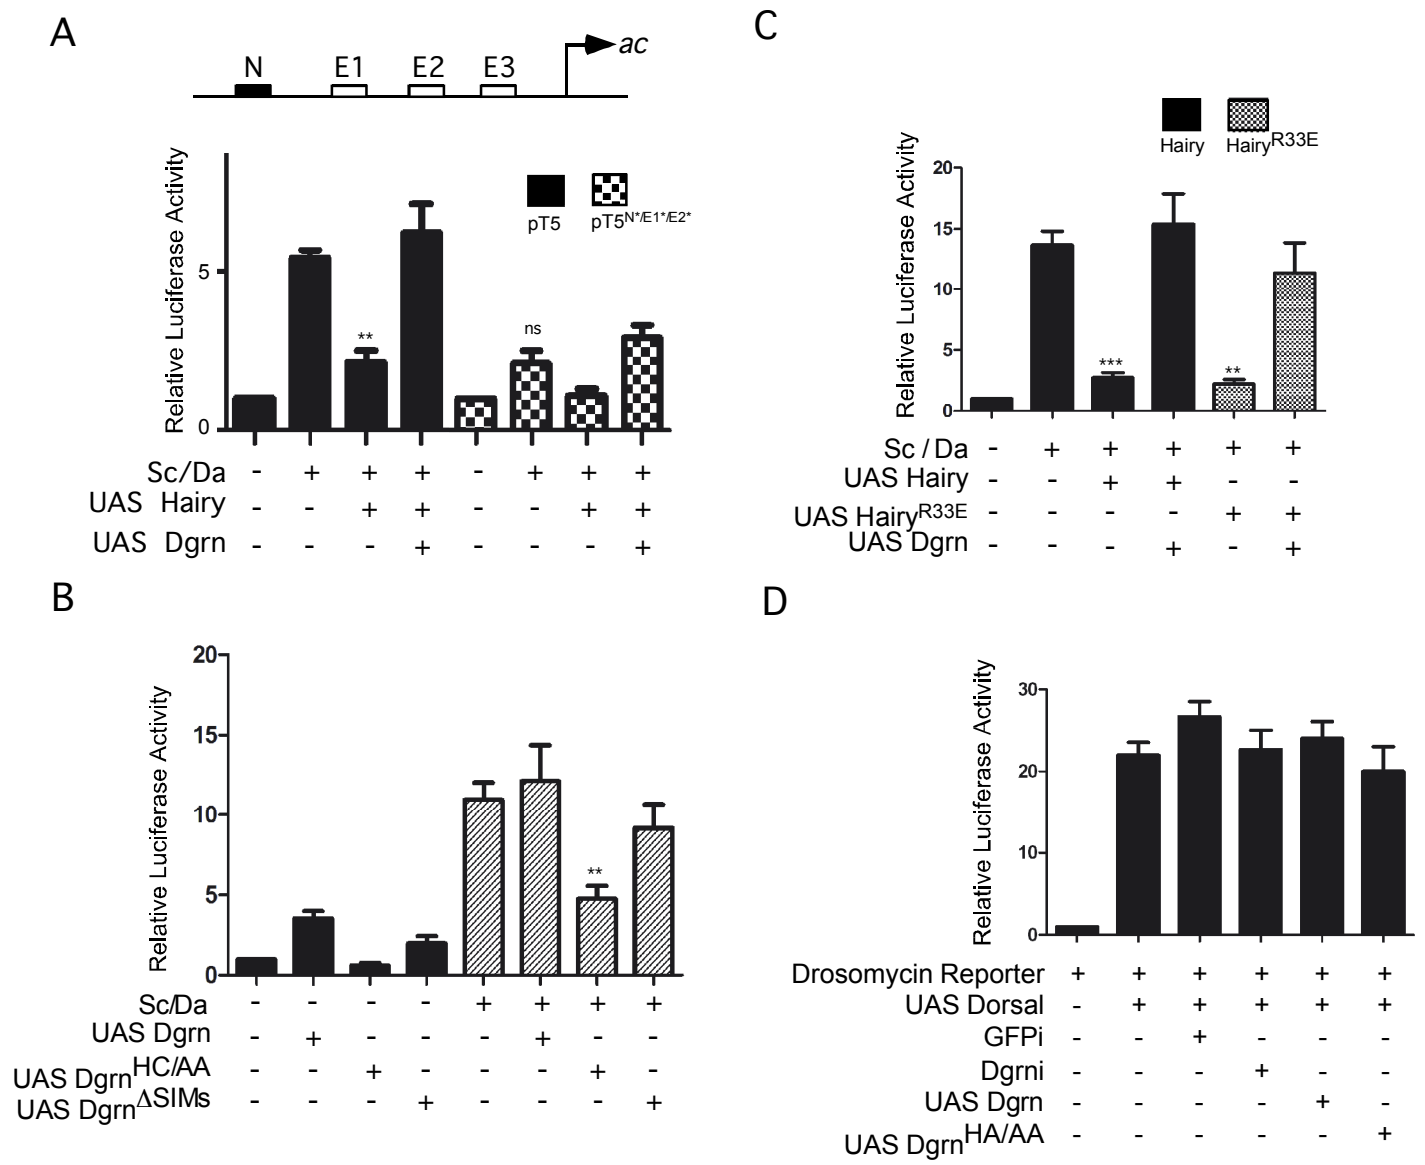

**Figure S4. Dgrn's transcriptional activity is specific to the *ac* reporter and requires Dgrn's ligase activity.**

Shown are Luciferase reporter assays with the indicated plasmids in S2R *Drosophila* cells.

**(A, B)** Dgrn activity requires specific binding sites within the *ac* promoter. **(A)** Upper panel denotes the specific binding sites within the *ac* reporter required for Da, Sc, and Hairy transcriptional activity. Analysis of the impact of point mutations within the *ac* reporter (N\*/E1\*/E2\*), show that inactivating even part of these sites is sufficient to inhibit transcriptional activity. **(B)** Dgrn and its RING and SIM mutants require the activity of sequence specific transcription factors and have an insignificant effect on their own in the absence of Sc and Da. **(C)** Dgrn successfully alleviates Hairy<sup>R33E</sup> mediated repression of the *ac* promoter in S2R *Drosophila* cells. Similar to Hairy, the Hairy<sup>R33E</sup> mutant effectively represses transcription from the *ac* luciferase reporter. Dgrn alleviates *ac* repression regardless of Dgrn's incapability to bind or ubiquitylate Hairy<sup>R33E</sup>. **(D)** In contrast to Dgrn's effect on the *ac* reporter, expression of Dgrn, or its RING mutant as well as reduction of Dgrn levels via RNAi have no effect on Dorsal dependent activation of the Drosomycin reporter (1). Expression of Dorsal, Dgrn expression vectors and RNAi efficiency were confirmed by western-blot (not shown). In all experiments, 4 independent experiments were performed. Statistical analysis including SEM and t-test comparisons were performed using Prism5 Anova software. \*\*\*= P<0.001; \*\*= P<0.01. ns; not significant.

(1) Goto A, Matsushita K, Gesellchen V, El Chamy L, Kuttentkeuler D, Takeuchi O, Hoffmann JA, Akira S, Boutros M, and Reichhart JM (2008) Akirins are highly conserved nuclear proteins required for NF-κB-dependent gene expression in drosophila and mice *Nature Immunology* 9: 97-104

**Abed et al.\_ Figure S5**

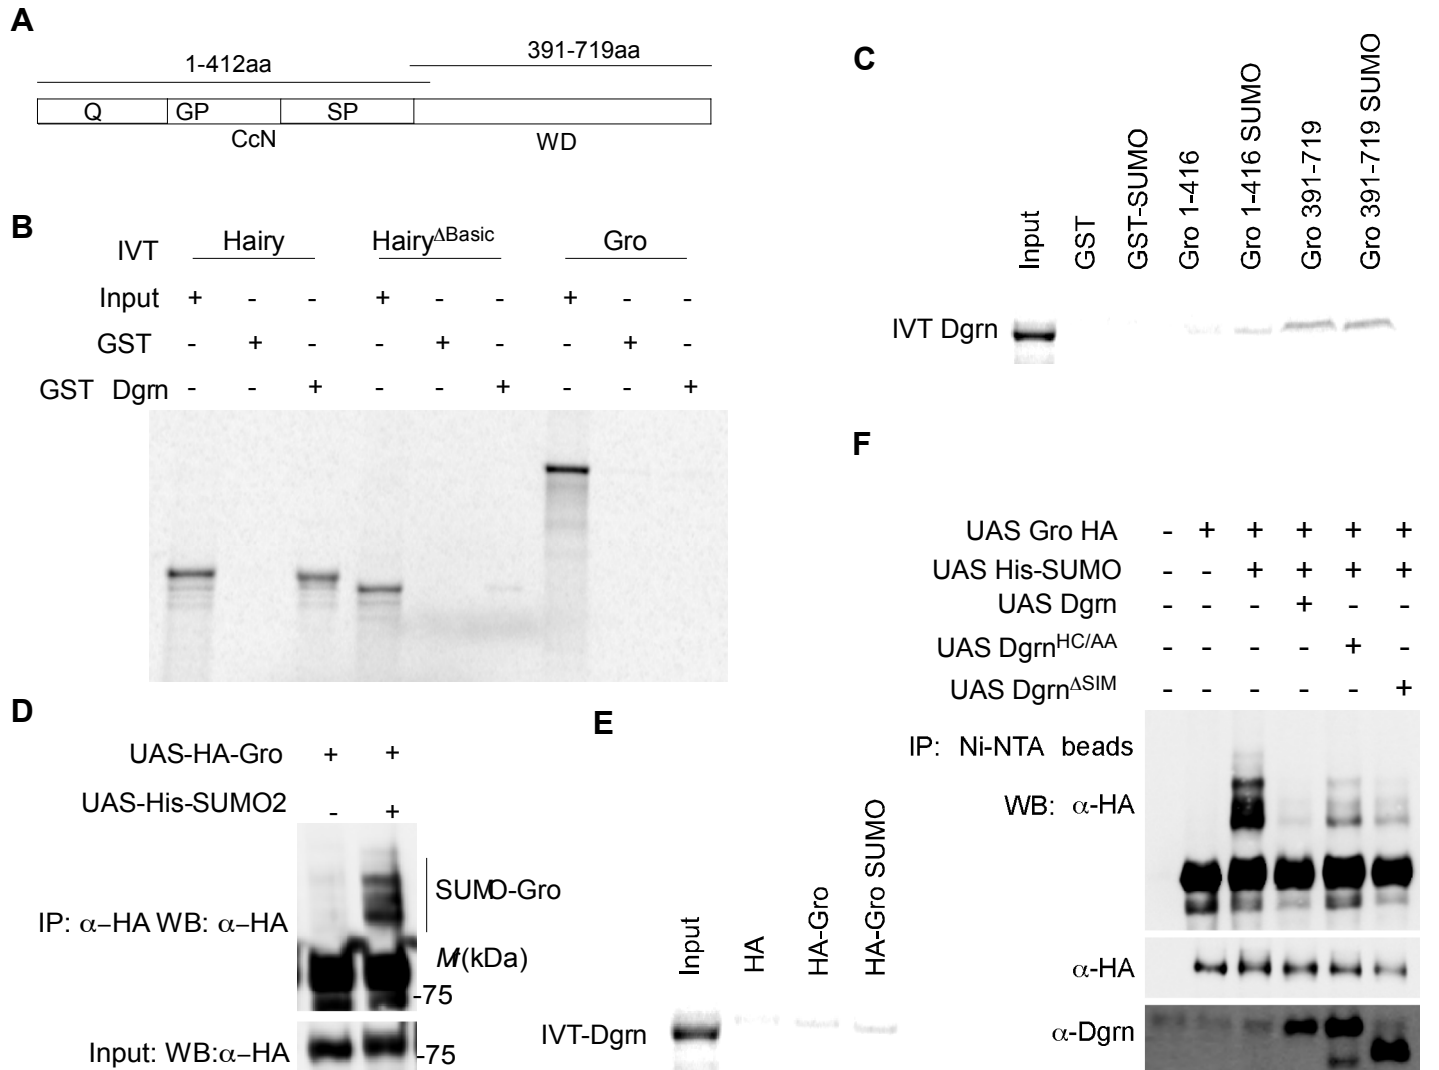

**Figure S5. Dgrn does not bind Gro directly, but targets SUMOylated Gro.**

**(A)** Schematic diagram of Gro, indicating Gro's protein domains.

**(B)** GST pull-down assay with GST-Dgrn. Dgrn binds to IVT-Hairy but not to unmodified IVT-Gro or IVT-Hairy lacking the basic domain. **(C)** Dgrn binds weakly to the WD40-domain fragment of Gro in its naive form or when it is SUMOylated in bacteria. Shown is a GST pull-down assay using GST and GST-Gro fragments that were isolated from *Escherichia coli* bacteria with or without a SUMO expressing system (1). SUMOylation of the GST-fusion protein was verified using  $\alpha$ -SUMO antibodies(not shown).

**(D-E)** Gro and SUMOylated-Gro isolated from S2R *Drosophila* cells bind weakly to IVT-Dgrn. HA-Gro was transfected into S2R cells in the absence or along with His-SUMO. Subsequently naive or SUMOylated-Gro was immunoprecipitated (IP is shown in D). Beads bound by either Gro or SUMOylated-Gro were used in an *in vitro* binding assay with IVT-Dgrn. Regardless of the SUMOylation status of Gro, only weak binding was detected.

**(F)** Dgrn selectively targets SUMOylated Gro in a RING and SIM dependent manner. Western blot analysis of S2R cell-derived extracts. Cells were transfected with the indicated plasmids. 48h post transfection, cells were harvested and subsequently SUMOylated proteins were precipitated using Ni-NTA beads. Gro and SUMOylated-Gro were detected using HA-antibody. Note that since expression of Dgrn affects Gro protein levels, the amount of material used for IP was adjusted to have equal amounts of naive Gro. Under these conditions, it is apparent that Dgrn specifically targets SUMOylated-Gro. Targeting SUMOylated-Gro requires intact RING and SIM domains. The expression of endogenous and transfected Dgrn is shown in the bottom panel.

(1) Uchimura Y, Nakamura M, Sugawara K, Nakao M, Saitoh H. (2004). Overproduction of eukaryotic SUMO-1- and SUMO-2-conjugated proteins in *Escherichia coli*. *Anal Biochem.* **331**:204-206.



**Abed et al.\_ Figure S6**

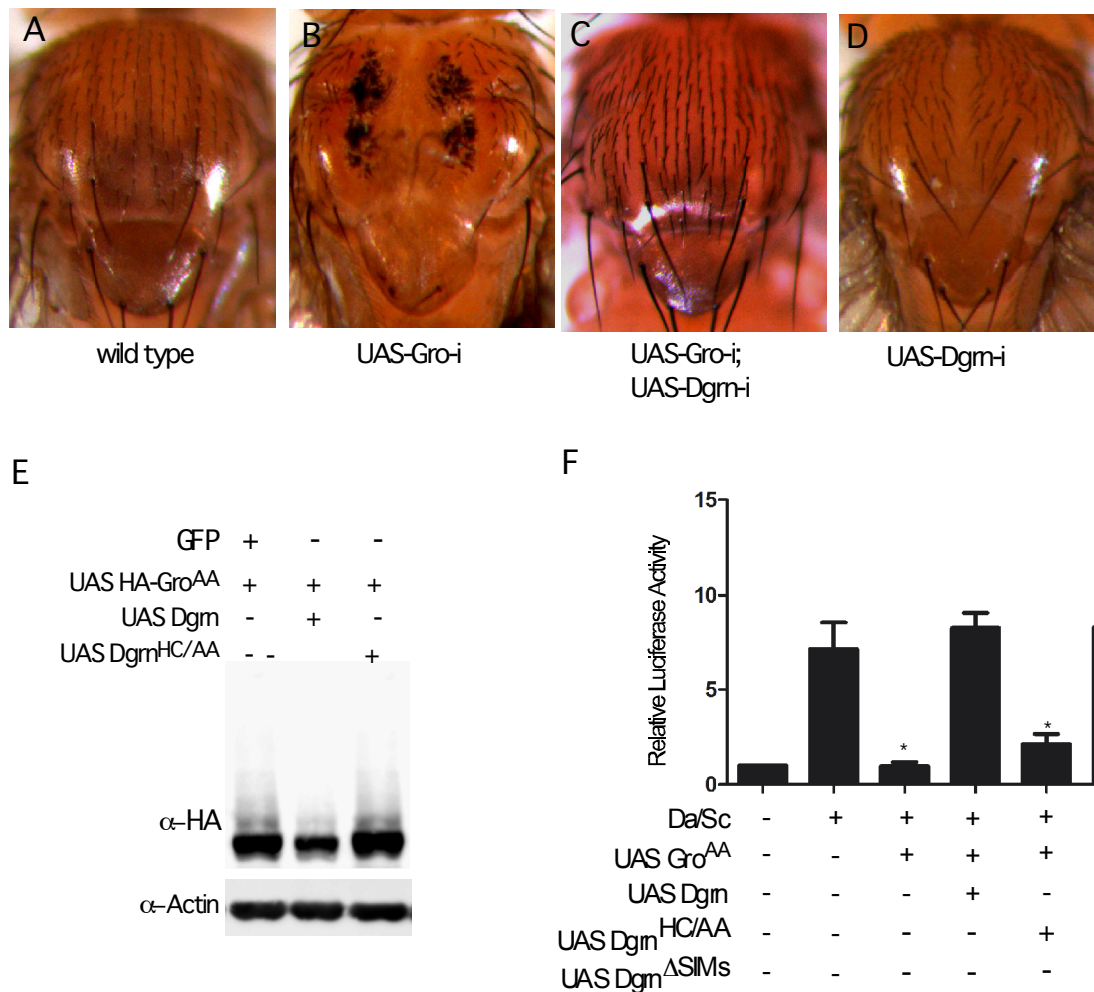

**Figure S6. Targeted reduction of Dgrn levels suppresses the Gro accessory bristle phenotype and is independent of priming RTK phosphorylation.**

**(A-D)** Reduction of Dgrn levels suppresses the Gro phenotype during sensory bristle specification. Reduction of Gro levels using UAS-RNAi transgene (Gro-i), under the control of Pnr-Gal4 results in ectopic bristle formation lateral to the midline [Compare (A) to (B)]. Co-expression of Dgrn RNAi-transgene (Dgrn-i) suppresses this Gro phenotype (C). Note that expression of Dgrn-i or the Pnr-Gal4 driver alone results in only a mild bristle hypoplasia (D, and not shown).

**(E-F)** Dgrn function is independent of priming RTK phosphorylation of Gro. Western blot analysis of RIPA derived S2R extracts (E). Cells were transfected with the indicated plasmids, and RIPA derived protein extract were prepared. The protein levels of HA-Gro<sup>AA</sup> that can not undergo RTK mediated phosphorylation are reduced upon expression of functional Dgrn, but not by Dgrn<sup>HC/AA</sup>. (F) HA-Gro<sup>AA</sup> mediated repression of the *ac* luciferase reporter is alleviated by co-expression of Dgrn.

Data was calculated from 3 independent experiments. Statistical analysis including SEM and t-test comparisons were performed using Prism5 software. \*= P<0.1
